# Supplementary material
Source: PubMed Central journal article supplement (PMC8440214)
Supplement: 41380_2020_991_MOESM3_ESM.pdf [file 41380_2020_991_MOESM3_ESM.pdf]

| PPXXF motif containing genes in PSD (227) | Human | Bovine | Mouse | Rat | ASD & SZ risk genes | BD risk genes | Homer1/2/3 interactors in BioGrid and text mining |
|-------------------------------------------|-------|--------|-------|-----|---------------------|---------------|---------------------------------------------------|
| ABI2                                      | o     | o      | o     | o   | X                   | X             | O                                                 |
| ABR                                       | o     | o      | o     | o   | X                   | X             | X                                                 |
| ADD3                                      | o     | o      | o     | o   | X                   | O             | X                                                 |
| AFG3L2                                    | o     | o      | o     | o   | X                   | X             | X                                                 |
| AGAP3                                     | o     | o      | o     | o   | X                   | X             | X                                                 |
| AGRN                                      | x     | o      | o     | o   | X                   | X             | X                                                 |
| ALDH5A1                                   | x     | x      | o     | x   | O                   | X             | X                                                 |
| ANK3 (190KDa)                             | o     | o      | o     | o   | O                   | O             | X                                                 |
| ANXA11                                    | o     | o      | o     | o   | X                   | X             | X                                                 |
| ANXA3                                     | o     | o      | x     | x   | X                   | X             | X                                                 |
| AP1B1                                     | o     | o      | o     | o   | X                   | X             | X                                                 |
| AP2A1                                     | o     | o      | o     | o   | X                   | X             | X                                                 |
| AP2B1                                     | o     | o      | o     | o   | X                   | X             | X                                                 |
| APOO                                      | o     | o      | o     | x   | X                   | X             | X                                                 |
| APOOL                                     | o     | o      | o     | o   | X                   | X             | X                                                 |
| ARHGAP21                                  | x     | x      | o     | o   | X                   | X             | X                                                 |
| ARHGAP33                                  | x     | o      | o     | o   | X                   | X             | X                                                 |
| ARHGAP39                                  | o     | x      | x     | x   | X                   | X             | X                                                 |
| ARHGEF7                                   | o     | o      | o     | o   | X                   | X             | X                                                 |
| ASAP1                                     | o     | o      | o     | o   | O                   | X             | X                                                 |
| ATF7IP                                    | x     | x      | o     | o   | X                   | X             | X                                                 |
| ATP1A2                                    | x     | x      | x     | x   | X                   | X             | X                                                 |
| ATP8A2                                    | o     | o      | o     | x   | X                   | X             | X                                                 |
| ATRX                                      | o     | o      | o     | o   | O                   | X             | X                                                 |
| ATXN2                                     | o     | o      | o     | x   | X                   | X             | X                                                 |
| BAG6                                      | x     | x      | o     | o   | X                   | X             | X                                                 |
| BCAN                                      | o     | x      | x     | x   | X                   | X             | X                                                 |
| CACNA1A                                   | o     | o      | o     | o   | X                   | X             | X                                                 |
| CACNA1C                                   | o     | o      | o     | o   | O                   | O             | O                                                 |
| CACNB1                                    | o     | o      | o     | o   | X                   | X             | X                                                 |
| CACNB3                                    | o     | o      | o     | o   | X                   | X             | X                                                 |
| CACNB4                                    | o     | o      | o     | o   | X                   | X             | X                                                 |
| CAD                                       | o     | o      | o     | o   | X                   | X             | X                                                 |
| CALCOO1                                   | o     | o      | o     | o   | X                   | X             | X                                                 |
| CAP2                                      | o     | o      | o     | o   | X                   | X             | X                                                 |
| CAPZA1                                    | o     | o      | o     | o   | X                   | X             | O                                                 |
| CAPZA2                                    | o     | o      | o     | o   | X                   | X             | X                                                 |
| CDH11                                     | o     | o      | o     | o   | O                   | X             | X                                                 |
| CKAP4                                     | o     | x      | o     | o   | X                   | X             | X                                                 |
| CLASP1                                    | o     | o      | o     | o   | O                   | X             | X                                                 |
| CLU                                       | o     | x      | o     | x   | X                   | X             | X                                                 |
| CNTN1                                     | o     | o      | o     | o   | X                   | X             | X                                                 |
| CNTN6                                     | o     | o      | o     | o   | O                   | X             | X                                                 |
| COBL                                      | o     | x      | x     | x   | X                   | X             | X                                                 |
| COX7A2L                                   | o     | o      | o     | o   | X                   | X             | X                                                 |
| CPEB3                                     | o     | o      | o     | o   | X                   | X             | X                                                 |
| CYP1B1                                    | o     | o      | o     | o   | X                   | X             | X                                                 |
| DAAM2                                     | o     | o      | o     | x   | X                   | X             | X                                                 |
| DACT3                                     | o     | o      | o     | o   | X                   | X             | X                                                 |
| DAGLA                                     | o     | o      | o     | o   | O                   | X             | X                                                 |
| DBN1                                      | o     | o      | o     | o   | X                   | X             | O                                                 |
| DCHS1                                     | x     | o      | o     | o   | X                   | O             | X                                                 |
| DCTN1                                     | o     | o      | o     | o   | X                   | X             | X                                                 |
| DDX17                                     | o     | o      | o     | o   | X                   | X             | X                                                 |
| DECR1                                     | o     | x      | o     | o   | X                   | X             | X                                                 |
| DHX30                                     | x     | x      | x     | x   | X                   | X             | X                                                 |
| DHX57                                     | o     | o      | x     | x   | X                   | X             | X                                                 |
| DNM3                                      | o     | x      | o     | o   | X                   | X             | X                                                 |
| DPP10                                     | o     | o      | o     | o   | O                   | X             | X                                                 |

|          |   |   |   |   |   |   |   |
|----------|---|---|---|---|---|---|---|
| EHMT2    | o | o | o | o | X | X | X |
| EPB41L1  | o | o | o | o | O | X | X |
| EPB41L3  | o | o | o | o | X | X | X |
| EPS15    | o | o | o | o | X | X | X |
| EPS15L1  | o | o | o | o | X | X | X |
| EPS8     | o | o | o | o | X | X | X |
| FAAH     | o | o | o | o | X | X | X |
| FAM120C  | x | x | o | x | X | X | X |
| FAM171A2 | o | x | o | o | X | X | X |
| FASN     | o | o | o | o | X | X | X |
| FBXO6    | x | x | o | x | X | X | X |
| FDPS     | o | o | o | o | X | X | X |
| FGD4     | x | x | o | x | X | X | X |
| FGF2     | o | o | o | o | X | X | X |
| FLNC     | o | o | o | o | X | X | X |
| FMNL2    | o | o | o | o | X | X | X |
| FMNL3    | o | o | o | o | X | X | X |
| FNBP1L   | o | o | o | o | X | X | X |
| FRMPD3   | o | o | o | o | X | X | X |
| FRY      | o | o | o | o | X | X | X |
| G3BP2    | o | x | o | x | X | X | X |
| GAK      | o | x | x | x | X | X | X |
| GDAP1L1  | o | o | o | o | X | X | X |
| GNAS     | o | x | x | x | O | X | X |
| GOT1     | o | o | o | o | X | X | X |
| GPRIN1   | o | o | o | o | X | X | X |
| GRIA3    | o | o | o | o | X | X | X |
| GRIA4    | o | o | o | o | X | X | X |
| GRIN2A   | o | o | o | o | O | O | X |
| GRIN2B   | o | o | o | o | O | X | O |
| GRIN2D   | o | o | o | o | X | X | X |
| GRM1     | o | x | o | o | X | X | O |
| GRM2     | o | o | o | o | X | X | X |
| GRM5     | o | o | o | o | O | X | O |
| GRM7     | o | o | o | o | O | X | X |
| GSN      | o | o | o | o | X | X | X |
| HAX1     | o | x | o | x | X | X | X |
| HDAC11   | o | o | o | o | X | X | X |
| HECW2    | o | o | o | o | O | X | X |
| HTT      | o | x | o | x | X | X | X |
| IGLON5   | o | o | o | o | X | X | X |
| INPP4A   | o | o | o | o | X | X | X |
| IRGQ     | o | o | o | o | X | X | X |
| ITM2B    | x | x | x | x | O | X | O |
| ITM2C    | o | o | o | o | O | X | X |
| ITPR1    | o | o | o | o | O | X | O |
| ITPR2    | o | o | o | o | X | X | X |
| ITPR3    | o | o | o | o | X | X | X |
| KCNJ4    | o | o | o | o | X | X | X |
| KCNMA1   | o | o | o | o | O | X | X |
| KDM3B    | o | o | x | o | X | X | X |
| KIAA1217 | o | x | x | x | X | X | X |
| KIF17    | o | o | o | o | X | X | X |
| KIF1A    | o | o | o | o | X | X | X |
| KIF21A   | x | o | o | o | X | X | X |
| KIF3A    | o | o | o | o | X | X | X |
| KPNA1    | o | o | o | o | X | X | X |
| L1CAM    | o | o | x | x | X | X | X |
| LAP3     | o | o | x | x | X | X | X |
| LIMCH1   | o | o | o | o | X | X | X |
| LIPE     | o | o | o | o | X | X | X |
| LMO7     | o | o | o | o | X | X | X |
| LMTK2    | o | x | o | o | X | X | X |

|          |   |   |   |     |   |   |   |
|----------|---|---|---|-----|---|---|---|
| LMTK3    | o | x | o | x   | X | X | X |
| LRP1     | o | o | o | o   | O | X | X |
| LRPPRC   | o | o | o | o   | X | X | X |
| LRRC47   | o | o | o | o   | X | X | X |
| LRRC8A   | o | o | o | o   | X | X | X |
| MAG      | o | o | o | o   | X | X | X |
| MAGI2    | o | x | o | o   | X | X | X |
| MAGI3    | o | x | x | x   | X | X | X |
| MAP2     | x | o | o | x   | X | X | X |
| MAP3K12  | x | o | o | o   | X | X | X |
| MGST3    | o | o | o | o   | X | X | X |
| MKL2     | o | o | o | x   | O | X | X |
| MLF1     | o | o | o | o   | X | X | X |
| MYCBP2   | o | o | o | o   | X | X | X |
| MYH6     | o | o | o | o   | X | O | X |
| MYO1C    | o | o | o | o   | X | X | X |
| MYO1D    | o | o | o | o   | X | X | X |
| MYO1E    | x | x | o | x   | O | X | X |
| MYO5C    | o | x | x | x   | O | X | X |
| MYO6     | o | o | o | o   | X | X | X |
| MYO7B    | o | o | o | o   | X | X | X |
| NEGR1    | o | o | o | o   | O | X | X |
| NFASC    | x | x | x | x   | X | X | X |
| NRCAM    | o | x | o | o   | O | X | X |
| NRXN2    | o | x | x | o   | O | X | X |
| NTNG2    | o | o | o | o   | X | X | X |
| NUMBL    | x | x | o | o   | X | X | X |
| OGDHL    | o | o | x | x   | X | X | X |
| ORC1     | x | o | x | x   | X | X | X |
| PAG1     | x | o | x | x   | X | X | X |
| PC       | o | o | o | o   | X | O | X |
| PDE4D    | x | x | o | x   | X | X | X |
| PDXP     | x | x | x | o   | X | X | X |
| PHLDB1   | o | o | o | o   | O | X | X |
| PICALM   | o | o | o | o   | X | X | X |
| PIGK     | o | o | o | o   | X | X | X |
| PLEKHA7  | o | o | o | o   | X | X | X |
| PPM1H    | o | o | o | o   | X | X | X |
| PREX1    | x | x | o | x   | O | X | X |
| PRKAR2A  | x | x | x | o   | X | X | X |
| PRRC2A   | o | o | o | o   | O | X | X |
| PRRC2C   | o | o | o | N/A | X | X | X |
| PSMD1    | o | o | o | o   | X | X | X |
| PTPN23   | o | o | x | o   | X | X | X |
| RAP1GDS1 | o | o | o | o   | X | X | X |
| RAPGEF6  | o | o | o | o   | X | X | X |
| RHOT1    | o | o | o | o   | X | X | X |
| RHOT2    | x | x | o | x   | X | X | X |
| RIN1     | o | o | o | o   | X | X | X |
| ROCK1    | o | o | o | o   | X | X | X |
| RPS26    | o | o | o | o   | X | X | X |
| RTN1     | o | o | o | o   | X | X | X |
| RTN4     | x | x | o | o   | X | X | X |
| SACS     | o | o | o | o   | X | X | X |
| SBF1     | o | o | o | o   | O | X | X |
| SCIN     | x | x | x | x   | X | X | X |
| SEC24C   | o | o | o | o   | X | X | X |
| SEC31A   | o | o | o | o   | O | X | X |
| SGSM1    | o | o | o | o   | X | X | X |
| SH3BGRL2 | o | o | o | o   | X | X | X |
| SH3PXD2A | o | o | o | o   | X | X | X |
| SHANK1   | o | o | o | o   | O | X | O |
| SHANK2   | o | o | o | o   | O | O | O |

|         |   |   |   |   |   |   |   |
|---------|---|---|---|---|---|---|---|
| SHANK3  | o | o | o | o | O | X | O |
| SIRT2   | x | x | x | o | X | X | X |
| SLC4A4  | o | o | o | o | X | X | X |
| SMARCA1 | o | o | o | o | X | X | X |
| SNX12   | o | o | o | o | X | X | X |
| SNX3    | o | o | o | o | X | X | X |
| SPEG    | o | o | o | o | X | X | X |
| SRGAP3  | o | o | o | o | O | X | X |
| ST14    | x | o | x | x | X | X | X |
| STK38L  | o | x | o | x | O | X | X |
| SYT11   | o | o | o | o | X | X | X |
| TACC1   | x | x | o | x | X | X | X |
| TAOK2   | x | x | o | o | O | O | X |
| TBCD    | x | x | x | x | X | X | X |
| TJP1    | o | x | o | o | X | X | X |
| TJP2    | o | o | o | o | X | X | X |
| TLN1    | o | o | o | o | X | X | X |
| TNC     | x | x | x | x | X | X | X |
| TOMM20  | o | o | o | o | X | X | X |
| TPP1    | o | o | o | o | X | X | X |
| TRAPPC9 | o | o | o | o | O | X | X |
| TRIM46  | o | o | o | o | X | X | X |
| TSG101  | o | o | o | o | X | X | X |
| UBR4    | o | o | o | o | X | X | X |
| UPF1    | o | o | o | o | X | X | X |
| USP14   | o | o | o | o | X | X | X |
| USP9X   | o | o | o | o | X | X | X |
| VAV2    | o | x | x | o | X | X | X |
| VCAN    | x | x | o | o | X | X | X |
| VPS13A  | o | o | o | x | X | X | X |
| VPS16   | o | o | o | o | X | X | X |
| VPS33A  | o | o | o | o | X | X | X |
| VPS35   | o | o | o | o | X | X | X |
| VPS53   | x | x | x | x | X | X | X |
| WASF2   | o | o | o | o | X | X | O |
| WDR1    | o | o | o | o | X | X | X |
| WDR6    | o | o | o | o | X | X | X |
| WIPF2   | o | o | o | o | X | X | X |
| WNK1    | x | x | o | x | X | X | X |
| WNK2    | o | x | o | x | X | X | X |
| XPO1    | o | o | o | o | O | X | O |
| ZDHHC8  | x | o | o | o | X | X | X |
